# Supplementary material for: Homocysteine impedes neurite outgrowth recovery after intracerebral haemorrhage by downregulating pCAMK2A
Source: HighWire-hosted journal article supplement (doi:10.1136/svn-2022-002165), 2023-02-28
Supplement: svn-2022-002165supp005_data_supplement.pdf [file svn-2022-002165supp005_data_supplement.pdf]

| Accession | Entrez.Gene | Ensembl.Gene | Symbol      | log2FC    | p. value | p. adjust. | direction |
|-----------|-------------|--------------|-------------|-----------|----------|------------|-----------|
| Q921I1    | 22041       | ENSMUSG00C   | Trf         | -2.680639 | 0.0446   | 0.267      | down      |
| Q61838    | 11287       | ENSMUSG00C   | Pzp         | -4.196662 | 0.000421 | 0.00253    | down      |
| Q8BTM8    | 192176      | ENSMUSG00C   | Flna        | -1.835946 | 0.0467   | 0.28       | down      |
| P28665    | 17836       | ENSMUSG00C   | Mug1        | -1.894603 | 0.0434   | 0.26       | down      |
| Q61233    | 18826       | ENSMUSG00C   | Lcp1        | -1.887831 | 0.0452   | 0.271      | down      |
| P10107    | 16952       | ENSMUSG00C   | Anxa1       | -4.818541 | 0.041    | 0.246      | down      |
| P07759    | 20714       | NA           | Serpina3k   | -2.687028 | 0.0451   | 0.27       | down      |
| Q61696    | 193740; 1F  | ENSMUSG00C   | Hspa1a; Hs  | -1.759362 | 0.00163  | 0.00977    | down      |
| Q8K183    | 216134      | ENSMUSG00C   | Pdxk        | 1.4106075 | 0.0213   | 0.128      | up        |
| Q9QYG0    | 29811       | ENSMUSG00C   | Ndrp2       | -1.002546 | 0.0439   | 0.263      | down      |
| Q61147    | 12870       | ENSMUSG00C   | Cp          | -2.599425 | 0.048    | 0.288      | down      |
| Q00623    | 11806       | ENSMUSG00C   | Apoa1       | -2.351599 | 0.046    | 0.276      | down      |
| P13020    | 227753      | ENSMUSG00C   | Gsn         | -1.041349 | 0.00746  | 0.0448     | down      |
| Q8VCM7    | 99571       | ENSMUSG00C   | Fgg         | -5.223086 | 0.0435   | 0.261      | down      |
| Q00612    | 14381       | ENSMUSG00C   | G6pdx       | -1.449393 | 0.0211   | 0.126      | down      |
| 070443    | 14687       | ENSMUSG00C   | Gnaz        | 2.0720626 | 0.00461  | 0.0277     | up        |
| P06909    | 12628       | ENSMUSG00C   | Cfh         | -1.626662 | 0.0258   | 0.155      | down      |
| Q9CPW0    | 66797       | NA           | Cntnap2     | -1.600495 | 0.00038  | 0.00228    | down      |
| P05555    | 16409       | NA           | Itgam       | -3.477738 | 0.0222   | 0.133      | down      |
| Q9CZ30    | 67059       | ENSMUSG00C   | Ola1        | -1.431831 | 0.0351   | 0.211      | down      |
| P11835    | 16414       | NA           | Itgb2       | -2.956178 | 0.0284   | 0.17       | down      |
| Q62418    | 13169       | ENSMUSG00C   | Dbn1        | -1.165289 | 0.0145   | 0.0869     | down      |
| P48318    | 14415       | ENSMUSG00C   | Gad1        | 1.1018826 | 0.00566  | 0.0339     | up        |
| Q9D7G0    | 19139       | ENSMUSG00C   | Prps1       | -1.276001 | 0.00357  | 0.0214     | down      |
| Q99MN9    | 66904       | ENSMUSG00C   | Pccb        | -3.187011 | 0.00271  | 0.0163     | down      |
| Q9JKF1    | 29875       | ENSMUSG00C   | Iqgap1      | -4.293693 | 0.0299   | 0.18       | down      |
| Q8BIZ1    | 77531       | NA           | Anks1b      | -1.587535 | 0.0096   | 0.0576     | down      |
| Q61176    | 11846       | ENSMUSG00C   | Arg1        | -2.982718 | 0.0117   | 0.0704     | down      |
| Q9ET01    | 110095      | ENSMUSG00C   | Pyg1        | -2.623126 | 0.0218   | 0.131      | down      |
| P27005    | 20201       | ENSMUSG00C   | S100a8      | -3.516263 | 0.0485   | 0.291      | down      |
| Q8CGK7    | 14680       | ENSMUSG00C   | Gna1        | -1.300264 | 0.00196  | 0.0118     | down      |
| P63158    | 15289; 10C  | ENSMUSG00C   | Hmgbl1; Gm2 | -5.986824 | 0.00109  | 0.00653    | down      |
| P54227    | 16765       | ENSMUSG00C   | Stmn1       | -1.726061 | 0.000167 | 0.001      | down      |
| Q62059    | 13003       | NA           | Vcan        | -1.234004 | 0.00407  | 0.0244     | down      |
| Q91VN4    | 66098       | ENSMUSG00C   | Chchd6      | -2.775973 | 0.0104   | 0.0624     | down      |
| Q9CZT8    | 69908       | ENSMUSG00C   | Rab3b       | -1.348222 | 0.0458   | 0.275      | down      |
| Q9WVA4    | 21346       | ENSMUSG00C   | Tagln2      | -1.549734 | 0.0192   | 0.115      | down      |
| Q6URW6    | 71960       | ENSMUSG00C   | Myh14       | 1.4881134 | 0.0344   | 0.206      | up        |
| P21614    | 14473       | ENSMUSG00C   | Gc          | -2.797736 | 0.033    | 0.198      | down      |
| Q61599    | 11857       | ENSMUSG00C   | Arhgdib     | -3.737581 | 0.0307   | 0.184      | down      |
| P23953    | 13884       | ENSMUSG00C   | Ces1c       | -3.597455 | 0.0383   | 0.23       | down      |
| Q99JI6    | 215449      | ENSMUSG00C   | Rap1b       | 1.4500241 | 0.0226   | 0.136      | up        |
| Q61702    | 16424       | ENSMUSG00C   | Itih1       | -1.608903 | 0.0183   | 0.11       | down      |
| Q9CQX2    | 66427       | ENSMUSG00C   | Cyb5b       | -1.220541 | 0.00943  | 0.0566     | down      |
| Q68FL6    | 216443      | ENSMUSG00C   | Mars        | -1.199221 | 0.0124   | 0.0745     | down      |
| P42859    | 15194       | NA           | Htt         | -1.133909 | 0.0339   | 0.203      | down      |
| P19221    | 14061       | ENSMUSG00C   | F2          | -1.864458 | 0.0478   | 0.287      | down      |
| Q62393    | 21985       | ENSMUSG00C   | Tpd52       | -1.230711 | 0.00146  | 0.00878    | down      |
| Q7TMY8    | 59026       | ENSMUSG00C   | Huwe1       | -2.664121 | 0.00643  | 0.0386     | down      |
| Q3U5Q7    | 22169       | ENSMUSG00C   | Cmpk2       | -1.158989 | 0.0136   | 0.0817     | down      |

|        |           |            |            |            |           |         |        |      |
|--------|-----------|------------|------------|------------|-----------|---------|--------|------|
| Q9Z1Q5 | 114584    | ENSMUSG00C | Clic1      | -2.251477  | 0.0338    | 0.203   | down   |      |
| Q9CXS4 | 73139     | ENSMUSG00C | Cenpv      | -1.494529  | 0.0245    | 0.147   | down   |      |
| Q99LG2 | 212999    | ENSMUSG00C | Tnpo2      | 1.7233551  | 0.00365   | 0.0219  | up     |      |
| Q3TMH2 | 74616     | ENSMUSG00C | Scrn3      | 1.9324724  | 0.000544  | 0.00326 | up     |      |
| P30681 | 97165     | ENSMUSG00C | Hmgb2      | -4.44639   | 0.0227    | 0.136   | down   |      |
| P01872 | 16019     | NA         | Ighm       | -1.998248  | 0.014     | 0.0838  | down   |      |
| Q6P4T2 | 320632    | ENSMUSG00C | Snrnp200   | 1.147363   | 0.0143    | 0.0861  | up     |      |
| Q9Z0H4 | 14007     | ENSMUSG00C | Celf2      | -1.253417  | 0.0197    | 0.118   | down   |      |
| P47791 | 14782     | ENSMUSG00C | Gsr        | -1.152682  | 0.0187    | 0.112   | down   |      |
| Q3UP87 | 50701     | ENSMUSG00C | Elane      | -3.93949   | 0.0416    | 0.25    | down   |      |
| Q80VP0 | 70381     | ENSMUSG00C | Tecpr1     | 2.4089542  | 0.00121   | 0.00726 | up     |      |
| P49442 | 16329     | ENSMUSG00C | Inpp1      | 1.0579182  | 0.00744   | 0.0446  | up     |      |
| Q8C166 | 266692    | ENSMUSG00C | Cpne1      | -1.171652  | 0.000619  | 0.00371 | down   |      |
| P07309 | 22139     | ENSMUSG00C | Ttr        | -4.353105  | 0.0238    | 0.143   | down   |      |
| Q6P5E4 | 320011    | ENSMUSG00C | Uggt1      | -1.119286  | 0.0107    | 0.064   | down   |      |
| Q64213 | 22668     | NA         | Sf1        | 1.2372371  | 0.0169    | 0.101   | up     |      |
| P51437 | 12796     | ENSMUSG00C | Camp       | -3.869739  | 0.0251    | 0.15    | down   |      |
| A2AQ25 | 208618    | ENSMUSG00C | Et14       | -1.007436  | 0.0321    | 0.193   | down   |      |
| Q61096 | 19152     | NA         | Prtn3      | -2.763485  | 0.0303    | 0.182   | down   |      |
| P47962 | 100503670 | ENSMUSG00C | Rp15       | -1.591587  | 0.0267    | 0.16    | down   |      |
| Q6NS52 | 217480    | NA         | Dgkb       | -1.323346  | 0.0237    | 0.142   | down   |      |
| Q3V132 | 73333     | ENSMUSG00C | Slc25a31   | 1.5348712  | 0.00112   | 0.0067  | up     |      |
| Q9WV18 | 54393     | ENSMUSG00C | Gabbr1     | -2.894844  | 0.025     | 0.15    | down   |      |
| Q99K48 | 53610     | ENSMUSG00C | Nono       | -1.209455  | 0.0165    | 0.0992  | down   |      |
| Q8BR92 | 242481    | ENSMUSG00C | Paln2      | -1.039677  | 0.0123    | 0.074   | down   |      |
| Q9JKB1 | 50933     | ENSMUSG00C | Uchl3      | 1.2996872  | 0.0111    | 0.0664  | up     |      |
| Q01405 | 20334     | ENSMUSG00C | Sec23a     | -1.663459  | 0.0334    | 0.2     | down   |      |
| P01864 | 380793    | NA         | Ighg2a     | -4.00334   | 0.0185    | 0.111   | down   |      |
| Q05144 | 19354     | ENSMUSG00C | Rac2       | -4.8095    | 0.0315    | 0.189   | down   |      |
| Q9CZB0 | 66052     | ENSMUSG00C | Sdhc       | -1.762965  | 0.0207    | 0.124   | down   |      |
| Q3THW5 | 77605     | ENSMUSG00C | H2afv      | -1.558794  | 0.0105    | 0.0631  | down   |      |
| Q9JIF7 | 70349     | ENSMUSG00C | Copb1      | -1.753563  | 0.000876  | 0.00525 | down   |      |
| Q91V09 | 73447     | ENSMUSG00C | Wdr13      | -1.932981  | 0.00558   | 0.0335  | down   |      |
| P16045 | 16852     | ENSMUSG00C | Lgals1     | -2.0238    | 0.0104    | 0.0627  | down   |      |
| Q01339 | 11818     | ENSMUSG00C | Apoh       | -4.054454  | 0.0261    | 0.156   | down   |      |
| Q3U9G9 | 98386     | ENSMUSG00C | Lbr        | -2.311841  | 0.0363    | 0.218   | down   |      |
| Q9DC16 | 67458     | ENSMUSG00C | Ergic1     | -1.834019  | 0.0214    | 0.128   | down   |      |
| P06800 | NA        | NA         | NA         | -3.21514   | 0.0391    | 0.235   | down   |      |
| P39447 | 21872     | ENSMUSG00C | Tjp1       | -1.242128  | 0.00648   | 0.0389  | down   |      |
| P58404 | 97387     | ENSMUSG00C | Strn4      | -2.013346  | 0.0102    | 0.0609  | down   |      |
| P59325 | 217869;   | 1C         | ENSMUSG00C | Eif5; LOC1 | -1.041222 | 0.00903 | 0.0542 | down |
| Q8COL0 | 52837     | ENSMUSG00C | Tmx4       | -1.283934  | 0.00671   | 0.0403  | down   |      |
| Q3B7Z2 | 76303     | ENSMUSG00C | Osbp       | -1.382279  | 0.0242    | 0.145   | down   |      |
| P61222 | 24015     | ENSMUSG00C | Abce1      | -1.627304  | 0.0122    | 0.0731  | down   |      |
| Q8BJ42 | 244310    | ENSMUSG00C | D1gap2     | 1.4546025  | 0.00058   | 0.00348 | up     |      |
| Q8VDP4 | 219158    | ENSMUSG00C | 2610301G19 | -1.057374  | 0.0138    | 0.0826  | down   |      |
| Q6NVF9 | 432508    | ENSMUSG00C | Cpsf6      | -2.77742   | 0.0123    | 0.0737  | down   |      |
| Q80TM9 | 64652     | ENSMUSG00C | Nisch      | -1.579249  | 0.00971   | 0.0583  | down   |      |
| Q9QXT0 | 56530     | ENSMUSG00C | Cnpy2      | -2.673597  | 0.000529  | 0.00317 | down   |      |
| Q4VAE3 | 74868     | ENSMUSG00C | Tmem65     | -1.45075   | 0.00453   | 0.0272  | down   |      |
| Q61205 | 18476     | ENSMUSG00C | Pafah1b3   | 1.1617359  | 0.0141    | 0.0844  | up     |      |

|        |        |                        |           |          |         |      |
|--------|--------|------------------------|-----------|----------|---------|------|
| 035350 | 12333  | ENSMUSG00Capn1         | -2.409046 | 0.012    | 0.0722  | down |
| Q91YI0 | 109900 | ENSMUSG00As1           | -1.115503 | 0.0145   | 0.0867  | down |
| P63082 | 11984; | 10CENSMUSG00Atp6v0c; f | 1.3810479 | 0.00598  | 0.0359  | up   |
| Q9Z1J3 | 18041  | ENSMUSG00Nfs1          | -1.798314 | 0.000451 | 0.00271 | down |
| Q9ERI6 | 105014 | ENSMUSG00Rdh14         | -1.460606 | 0.0456   | 0.273   | down |
| Q7TQ95 | 69605  | ENSMUSG00Lnp; Lnpk     | -2.551429 | 0.014    | 0.0841  | down |
| 035857 | 21856  | ENSMUSG00Timm44        | 1.7054544 | 0.0136   | 0.0818  | up   |
| Q9DBG5 | 66905  | ENSMUSG00Plin3         | -2.569172 | 0.0231   | 0.138   | down |
| Q8BSS9 | 327814 | NA Ppfia2              | 1.0921188 | 0.0144   | 0.0863  | up   |
| Q9EQZ6 | 56508  | ENSMUSG00Ragef4        | -1.558502 | 0.00186  | 0.0112  | down |
| Q8OX50 | 74383  | ENSMUSG00Ubap21        | -1.336082 | 0.0361   | 0.216   | down |
| P60229 | 16341  | ENSMUSG00Eif3e         | -1.310566 | 0.000378 | 0.00227 | down |
| 088587 | 12846  | ENSMUSG00Comt          | 1.8072493 | 0.0137   | 0.0821  | up   |
| Q8VBW6 | 234664 | ENSMUSG00Nae1          | -1.150327 | 0.0106   | 0.0637  | down |
| Q9D1Q6 | 76299  | ENSMUSG00Erp44         | -1.484043 | 0.0129   | 0.0772  | down |
| Q9Z0U1 | 21873  | ENSMUSG00Tjp2          | -1.189715 | 0.0123   | 0.074   | down |
| Q9DAK9 | 75454  | ENSMUSG00Phpt1         | -1.311356 | 0.005    | 0.03    | down |
| P07310 | 12715  | ENSMUSG00Ckm           | 1.1545705 | 0.0266   | 0.16    | up   |
| Q8VDL4 | 72141  | NA Adpgk               | -2.707279 | 0.0372   | 0.223   | down |
| Q9DBZ5 | 73830  | ENSMUSG00Eif3k         | -1.297094 | 0.0336   | 0.201   | down |
| Q9DB60 | 66469  | ENSMUSG002810405K02    | -1.026145 | 0.0114   | 0.0682  | down |
| Q91VT4 | 234309 | ENSMUSG00Cbr4          | -1.569321 | 0.0473   | 0.284   | down |
| Q9Z0E6 | 14469  | ENSMUSG00Gbp2          | -1.92553  | 0.0294   | 0.176   | down |
| Q62523 | 22793  | ENSMUSG00Zyx           | -1.666114 | 0.029    | 0.174   | down |
| Q99KB8 | 14651  | NA Hagh                | -1.206572 | 0.0201   | 0.12    | down |
| Q69ZS6 | 75209  | ENSMUSG00Sv2c          | -2.101287 | 0.0385   | 0.231   | down |
| Q62426 | 13014  | ENSMUSG00Cstb          | -1.616725 | 0.0171   | 0.103   | down |
| Q99MR6 | 83701  | ENSMUSG00Srtr          | 1.4008814 | 0.0248   | 0.149   | up   |
| Q61730 | 16180  | ENSMUSG00Illrap        | -1.385644 | 0.0249   | 0.15    | down |
| Q6KAR6 | 211446 | ENSMUSG00Exoc3         | -1.23821  | 0.0485   | 0.291   | down |
| Q9QXB9 | 13495  | ENSMUSG00Drg2          | -4.272071 | 0.002    | 0.012   | down |
| Q9QYI3 | 56354  | ENSMUSG00Dnajc7        | -1.095199 | 0.0245   | 0.147   | down |
| Q80UP3 | 104418 | ENSMUSG00Dgkz          | -2.742226 | 0.000556 | 0.00333 | down |
| Q9ERT9 | 58200  | ENSMUSG00Ppp1rla       | 1.3946803 | 0.00806  | 0.0483  | up   |
| Q8K010 | 75475  | ENSMUSG00Oplah         | -1.485715 | 0.0315   | 0.189   | down |
| P32261 | 11905  | ENSMUSG00Serpinc1      | -3.244801 | 0.0412   | 0.247   | down |
| Q99NB1 | 68738  | ENSMUSG00Acss1         | -1.2823   | 0.0209   | 0.126   | down |
| P09813 | 11807  | ENSMUSG00Apoa2         | -3.230534 | 0.0433   | 0.26    | down |
| Q80VC9 | 69697  | ENSMUSG00Camsap3       | -1.557448 | 0.021    | 0.126   | down |
| Q99JG2 | 171469 | ENSMUSG00Gpr3711       | -1.847964 | 0.0102   | 0.061   | down |
| P18894 | 13142  | NA Dao                 | 1.5763776 | 0.00339  | 0.0203  | up   |
| Q9CQE1 | 66536  | ENSMUSG00Nipsnap3b     | -1.715242 | 0.0128   | 0.0769  | down |
| Q9D6Y7 | 110265 | ENSMUSG00Msra          | -1.254891 | 0.049    | 0.294   | down |
| P15327 | 12183  | ENSMUSG00Bpgm          | -1.595146 | 0.00259  | 0.0155  | down |
| Q9WUD1 | 56424  | ENSMUSG00Stub1         | 1.0412252 | 0.0208   | 0.125   | up   |
| Q9CY50 | 107513 | ENSMUSG00Ssr1          | -1.21073  | 0.000843 | 0.00506 | down |
| Q9JJY3 | 58994  | ENSMUSG00Smpd3         | 1.3876069 | 0.000636 | 0.00382 | up   |
| Q8BNU0 | 76813  | ENSMUSG00Armc6         | 2.4256749 | 0.00178  | 0.0107  | up   |
| P70460 | 22323  | ENSMUSG00Vasp          | -3.61219  | 0.0168   | 0.101   | down |
| 008992 | 53378  | ENSMUSG00Sdcbp         | 2.2582553 | 0.0338   | 0.203   | up   |
| Q921W4 | 66609  | ENSMUSG00Cryz11        | -1.407587 | 0.0434   | 0.26    | down |

|        |            |                      |           |          |              |
|--------|------------|----------------------|-----------|----------|--------------|
| Q9WTX2 | 23992      | ENSMUSG00CPrkra      | 2.738459  | 0.00755  | 0.0453 up    |
| Q8C8T8 | 69499      | NA Tsr2              | 2.3786824 | 0.00536  | 0.0322 up    |
| Q99J36 | 233802     | ENSMUSG00CThumpd1    | -1.366075 | 0.0498   | 0.299 down   |
| Q8K1L5 | 76497      | NA Ppplr11           | -1.507122 | 0.00608  | 0.0365 down  |
| Q01730 | 20163      | NA Rsul              | 1.7046185 | 0.00239  | 0.0143 up    |
| Q5M8N4 | NA         | NA NA                | 1.9123408 | 0.00809  | 0.0485 up    |
| Q9EPR5 | 81840      | ENSMUSG00CSorcs2     | -2.44633  | 0.00515  | 0.0309 down  |
| Q8VE62 | 218693     | ENSMUSG00CPaip1      | -1.038089 | 0.0182   | 0.109 down   |
| Q61239 | 14272      | ENSMUSG00CFnta       | -2.246488 | 0.00721  | 0.0432 down  |
| 055135 | 16418      | ENSMUSG00CEif6       | -3.224043 | 0.0144   | 0.0862 down  |
| Q9CQ10 | 66700      | ENSMUSG00CChmp3      | -2.025184 | 0.0409   | 0.245 down   |
| Q9DCT1 | 56043      | ENSMUSG00CAkr1e1     | -1.513334 | 0.0203   | 0.122 down   |
| P17665 | 12867; 654 | ENSMUSG00CCox7c; Gm1 | -1.027919 | 0.0429   | 0.257 down   |
| P50136 | 12039      | NA Bckdha            | 1.9517135 | 0.0443   | 0.266 up     |
| Q99NF2 | 56876      | ENSMUSG00CNe1f; Nsmf | -3.210885 | 0.000547 | 0.00328 down |
| Q8BHK1 | 233280     | ENSMUSG00CNipa1      | -1.976342 | 0.00446  | 0.0267 down  |
| Q8VE22 | 64656      | ENSMUSG00CMrps23     | 1.6358579 | 0.0222   | 0.133 up     |
| P63089 | 19242      | ENSMUSG00CPtn        | -1.065406 | 0.0254   | 0.152 down   |
| P06880 | 14599      | ENSMUSG00CGh         | -3.142823 | 0.0378   | 0.227 down   |
| P62305 | 20643      | ENSMUSG00CSnrpe      | 1.1291273 | 0.025    | 0.15 up      |
| P56565 | 20193      | NA S100a1            | 2.1412334 | 0.000683 | 0.0041 up    |
| Q9D2N9 | 77573      | ENSMUSG00CVps33a     | -1.389529 | 0.00291  | 0.0175 down  |
| Q3TCN2 | 71772      | ENSMUSG00CP1bd2      | -1.856771 | 0.00198  | 0.0119 down  |
| B1AR13 | 217149     | ENSMUSG00CCisd3      | 1.5963994 | 0.00011  | 0.000662 up  |
| Q9D967 | 67881      | ENSMUSG00CMdp1       | 1.189296  | 0.00777  | 0.0466 up    |
| 035459 | 51798      | ENSMUSG00CEch1       | -1.423175 | 0.0185   | 0.111 down   |
| Q64511 | 21974      | ENSMUSG00CTop2b      | 2.1186399 | 0.0231   | 0.139 up     |
| 054781 | 20817      | NA Srpk2             | 1.5890648 | 0.0104   | 0.0625 up    |
| Q9D0A3 | 70420      | ENSMUSG00C2610034B1E | -1.16392  | 0.000481 | 0.00288 down |
| Q8BWS5 | 243385     | ENSMUSG00CGprin3     | -2.793058 | 0.00717  | 0.043 down   |
| P62309 | 68011      | ENSMUSG00CSnrpg      | -2.001518 | 0.0015   | 0.00899 down |
| Q80WQ2 | 234729     | ENSMUSG00CVac14      | 1.2604916 | 0.000197 | 0.00118 up   |
| Q8K426 | 245195     | ENSMUSG00CRetnlg     | -1.676062 | 0.0249   | 0.149 down   |
| P97952 | 20266      | ENSMUSG00CScn1b      | -3.461152 | 0.00612  | 0.0367 down  |
| Q9WUB4 | 22428      | ENSMUSG00CDctn6      | 1.0299834 | 0.0147   | 0.0882 up    |
| Q9JHL1 | 65962      | NA Slc9a3r2          | -1.802869 | 0.00238  | 0.0143 down  |
| P59708 | 66055      | ENSMUSG00C0610009D07 | 2.326145  | 0.00307  | 0.0184 up    |
| Q9D4H1 | 66482      | ENSMUSG00CExoc2      | -2.159314 | 0.000606 | 0.00363 down |
| 088735 | 17761      | NA Map7; Mtaq        | -1.897358 | 0.031    | 0.186 down   |
| Q9D6S7 | 67871      | ENSMUSG00CMrrf       | 2.2308582 | 0.0279   | 0.168 up     |
| Q06335 | 11804      | ENSMUSG00CAplp2      | -3.806971 | 0.000967 | 0.0058 down  |
| P47743 | 14823      | ENSMUSG00CGrm8       | 1.0481418 | 0.00443  | 0.0266 up    |
| Q3TC33 | 67433      | ENSMUSG00CCcdc127    | 1.4717923 | 0.0215   | 0.129 up     |
| Q9ROM6 | 56382      | ENSMUSG00CRab9       | -1.547322 | 0.00343  | 0.0206 down  |
| P53702 | 15159      | ENSMUSG00CHccs       | -1.265621 | 0.0142   | 0.0855 down  |
| Q9Z1K5 | 23806      | ENSMUSG00CArih1      | -1.795791 | 0.0157   | 0.0939 down  |
| Q9Z2D1 | 77116      | ENSMUSG00CMtmr2      | 1.4537486 | 0.00312  | 0.0187 up    |
| Q99LB7 | 192166     | ENSMUSG00CSardh      | 1.5715842 | 0.000348 | 0.00209 up   |
| Q9ER35 | 63828      | ENSMUSG00CFn3k       | 1.3219223 | 0.00217  | 0.013 up     |
| Q00519 | 22436      | ENSMUSG00CXdh        | 1.2348119 | 0.0317   | 0.19 up      |
| Q9Z2V5 | 15185      | ENSMUSG00CHdac6      | 1.3695523 | 0.00137  | 0.00821 up   |

|        |            |                      |           |          |          |      |
|--------|------------|----------------------|-----------|----------|----------|------|
| P21300 | 11997      | ENSMUSG00CAkr1b7     | -1.031232 | 0.0296   | 0.177    | down |
| Q9QYF1 | 17252      | ENSMUSG00CRdh11      | -1.027108 | 0.00529  | 0.0317   | down |
| Q9DC63 | 57443      | ENSMUSG00CFbxo3      | -1.92199  | 0.0211   | 0.127    | down |
| Q7TNC4 | 192196     | ENSMUSG00CLuc712     | -1.446461 | 0.0158   | 0.0951   | down |
| Q3UYG8 | 72899      | ENSMUSG00CMacrod2    | -2.142741 | 0.0138   | 0.083    | down |
| Q61462 | 13057      | ENSMUSG00CCyba       | -1.488409 | 0.0227   | 0.136    | down |
| P59759 | 239719     | NA Mk12              | -5.776771 | 0.0123   | 0.074    | down |
| P56212 | 59046      | ENSMUSG00CArpp19     | -1.965753 | 0.000872 | 0.00523  | down |
| Q91YQ3 | 105859     | ENSMUSG00CCsdc2      | 1.4487528 | 0.00255  | 0.0153   | up   |
| Q8BYI8 | 74525      | ENSMUSG00C8430419L09 | 1.1023969 | 0.00049  | 0.00294  | up   |
| Q8VC42 | 76482      | ENSMUSG00C3110002H16 | 1.4285492 | 0.0297   | 0.178    | up   |
| O88845 | 56697      | ENSMUSG00CAkap10     | 1.6506329 | 0.000212 | 0.00127  | up   |
| Q3UHH2 | 73102      | ENSMUSG00CS1c22a23   | -1.163342 | 0.00755  | 0.0453   | down |
| Q60780 | 14457      | NA Gas7              | -1.638606 | 0.0484   | 0.29     | down |
| Q8C7D2 | 58799      | ENSMUSG00Crbn        | 1.2299186 | 0.00347  | 0.0208   | up   |
| O55057 | 18582      | ENSMUSG00CPde6d      | 1.3869579 | 0.000117 | 0.000704 | up   |
| Q9CXV1 | 66925      | ENSMUSG00CSdh        | -2.087069 | 0.0393   | 0.236    | down |
| Q8R395 | 66398      | NA Commd5            | 1.0355458 | 0.00188  | 0.0113   | up   |
| Q9D289 | 78232      | ENSMUSG00CTrappc6b   | 1.9819799 | 0.00645  | 0.0387   | up   |
| P00158 | 17711; 333 | ENSMUSG00CCYTB       | 1.2073603 | 0.00074  | 0.00444  | up   |
| Q8VCM8 | 103425     | ENSMUSG00CNcln       | 1.4502889 | 0.0139   | 0.0832   | up   |
| P61458 | 13180      | ENSMUSG00CPcbd1      | -1.455454 | 0.00556  | 0.0334   | down |
| Q3V038 | 69480      | ENSMUSG00CTtc9       | -1.444967 | 0.0253   | 0.152    | down |
| Q8C2E7 | 223593     | ENSMUSG00CE430025E21 | 1.2383117 | 0.0292   | 0.175    | up   |
| P69566 | 56705      | NA Ranbp9            | 2.2355521 | 0.0349   | 0.209    | up   |
| P70403 | 13047      | NA Cux1              | 1.444921  | 0.0319   | 0.191    | up   |
| Q8CDU6 | 226098     | ENSMUSG00CHectd2     | 1.00429   | 0.00322  | 0.0193   | up   |
| Q8VHK9 | 72162      | ENSMUSG00CDhx36      | 1.3552357 | 0.00294  | 0.0176   | up   |
| Q99N94 | 78523      | ENSMUSG00CMrp19      | 1.3636266 | 0.0115   | 0.0692   | up   |
| Q9CQS8 | 66212      | ENSMUSG00CSec61b     | -1.307809 | 0.0235   | 0.141    | down |
| Q9D387 | 76161      | ENSMUSG00CLamp5      | 1.6355638 | 0.0457   | 0.274    | up   |
| Q9ET22 | 83768      | ENSMUSG00CDpp7       | 1.4270379 | 0.00074  | 0.00444  | up   |
| Q9ESZ8 | 14886      | ENSMUSG00CGtf2i      | 1.8194526 | 0.011    | 0.0659   | up   |
| Q9ERR7 | 93684      | NA Sep15; Sel1       | 1.5160585 | 0.0472   | 0.283    | up   |
| Q6GYP7 | 56784      | ENSMUSG00CRalgapa1   | 1.7952365 | 0.0274   | 0.165    | up   |
| Q91X56 | 94226      | ENSMUSG00CS1pr5      | 1.6642691 | 0.000103 | 0.000619 | up   |
| Q9R112 | 59010      | ENSMUSG00CSqrd1; Sqc | -1.691798 | 0.0133   | 0.0801   | down |
| Q8CIV8 | 70430      | ENSMUSG00CTbce       | 1.0351649 | 0.00448  | 0.0269   | up   |
| P23090 | NA         | NA NA                | 1.1025474 | 0.00053  | 0.00318  | up   |
| Q9D826 | 19193      | ENSMUSG00CPipox      | 1.5929748 | 0.0164   | 0.0984   | up   |
| B2RUJ5 | 319924     | ENSMUSG00CApba1      | 3.4976881 | 0.00838  | 0.0503   | up   |
| Q80XG9 | 243499     | ENSMUSG00CLrrtm4     | 1.8754396 | 0.00152  | 0.00913  | up   |
| Q69ZX8 | 319713     | ENSMUSG00CAblim3     | 1.0808532 | 0.0218   | 0.131    | up   |
| Q8VEA4 | 72170      | ENSMUSG00CChhd4      | 1.1200809 | 0.0104   | 0.0626   | up   |
| Q9CR76 | 66690      | ENSMUSG00CTmem186    | 1.9404184 | 0.00267  | 0.016    | up   |
| P56213 | 11692      | ENSMUSG00CGfer       | -1.518523 | 0.0169   | 0.101    | down |
| P03903 | 17720; 333 | ENSMUSG00CND4L       | 1.0602195 | 0.0267   | 0.16     | up   |
| Q9DB50 | 108012     | ENSMUSG00CAp1s2      | 3.6972469 | 0.0212   | 0.127    | up   |
| Q91VU0 | 27999      | ENSMUSG00CFam3c      | 2.7144359 | 0.000287 | 0.00172  | up   |
| Q8VEB4 | 192654     | ENSMUSG00CPla2g15    | 1.2856069 | 0.0279   | 0.168    | up   |
| Q9D6F4 | 14397      | ENSMUSG00CGabra4     | 1.0275244 | 0.0317   | 0.19     | up   |

|        |                          |           |        |            |
|--------|--------------------------|-----------|--------|------------|
| Q8CE90 | 26400 ENSMUSG00CMap2k7   | 1.1060732 | 0.01   | 0.0601 up  |
| Q9CZX7 | 72519 ENSMUSG00C Tmem55a | -1.065626 | 0.0313 | 0.188 down |
