# Supplementary material for: Homocysteine impedes neurite outgrowth recovery after intracerebral haemorrhage by downregulating pCAMK2A
Source: HighWire-hosted journal article supplement (doi:10.1136/svn-2022-002165), 2023-02-28
Supplement: svn-2022-002165supp006_data_supplement.pdf [file svn-2022-002165supp006_data_supplement.pdf]

| Accession | Entrez     | Gene       | Ensembl    | Gene      | Symbol    | log2FC    | p. value | p. adjust. | direction |
|-----------|------------|------------|------------|-----------|-----------|-----------|----------|------------|-----------|
| O08599    | 20910      | ENSMUSG00C | Stxbp1     | -1.089388 | 0.0135532 | 0.5605597 | down     |            |           |
| Q9ERD7    | 22152      | ENSMUSG00C | Tubb3      | -1.698064 | 0.0029378 | 0.5605597 | down     |            |           |
| P61982    | 22628      | ENSMUSG00C | Ywhag      | -1.298326 | 0.023082  | 0.5605597 | down     |            |           |
| P08249    | 17448      | ENSMUSG00C | Mdh2       | -1.925963 | 0.0220373 | 0.5605597 | down     |            |           |
| P68510    | 22629      | ENSMUSG00C | Ywhah      | -1.124814 | 0.0355255 | 0.5605597 | down     |            |           |
| P14152    | 17449      | ENSMUSG00C | Mdh1       | -1.406065 | 0.0124585 | 0.5605597 | down     |            |           |
| P18760    | 12631      | ENSMUSG00C | Cf11       | -1.360619 | 0.0249473 | 0.5605597 | down     |            |           |
| Q920I9    | 104082     | ENSMUSG00C | Wdr7       | 1.7124286 | 0.0346641 | 0.5605597 | up       |            |           |
| P09528    | 14319      | ENSMUSG00C | Fth1       | -1.108161 | 0.015425  | 0.5605597 | down     |            |           |
| P28663    | 17957      | ENSMUSG00C | Napb       | -1.632112 | 0.0082812 | 0.5605597 | down     |            |           |
| P63024    | 22319      | ENSMUSG00C | Vamp3      | 2.2393148 | 0.0245863 | 0.5605597 | up       |            |           |
| O35098    | 26757      |            | Dpysl4     | -1.711211 | 0.0482246 | 0.5605597 | down     |            |           |
| Q01853    | 269523     | ENSMUSG00C | Vcp        | 1.0941875 | 0.0454886 | 0.5605597 | up       |            |           |
| P14231    | 11932      | ENSMUSG00C | Atp1b2     | -1.901788 | 0.0391097 | 0.5605597 | down     |            |           |
| P05132    | 18747      | ENSMUSG00C | Prkaca     | 1.4307088 | 0.043968  | 0.5605597 | up       |            |           |
| Q9R111    | 14544      | ENSMUSG00C | Gda        | -1.303626 | 0.0362251 | 0.5605597 | down     |            |           |
| Q80UG5    | 53860      | ENSMUSG00C | 9-Sep      | -1.739066 | 0.0161629 | 0.5605597 | down     |            |           |
| P45591    | 12632      | ENSMUSG00C | Cf12       | -2.016516 | 0.0149744 | 0.5605597 | down     |            |           |
| Q8CBH5    | 98682      | ENSMUSG00C | Mfsd6      | 1.50466   | 0.036483  | 0.5605597 | up       |            |           |
| Q8BU14    | 69276      | ENSMUSG00C | Sec62      | 1.7206499 | 0.0398114 | 0.5605597 | up       |            |           |
| Q80YA3    | 114874     |            | Ddhd1      | 1.893265  | 0.0046446 | 0.5605597 | up       |            |           |
| P47754    | 12343      | ENSMUSG00C | Capza2     | -1.860788 | 0.0354138 | 0.5605597 | down     |            |           |
| O70145    | 17970      | ENSMUSG00C | Ncf2       | -1.684982 | 0.0042812 | 0.5605597 | down     |            |           |
| O88685    | 19182      | ENSMUSG00C | Psmc3      | 1.0895305 | 0.0039137 | 0.5605597 | up       |            |           |
| Q9QYE3    | 14025      | ENSMUSG00C | Bc111a     | 1.0402102 | 0.0230681 | 0.5605597 | up       |            |           |
| Q8C5H8    | 68646      | ENSMUSG00C | Nadk2; Nac | -1.116742 | 0.0137187 | 0.5605597 | down     |            |           |
| Q5XJE5    | 235497     | ENSMUSG00C | Leo1       | 1.6268479 | 0.0111222 | 0.5605597 | up       |            |           |
| O55029    | 50797      | ENSMUSG00C | Copb2      | 1.4411263 | 0.0095804 | 0.5605597 | up       |            |           |
| Q80TL7    | 67074      | ENSMUSG00C | Mon2       | 1.820425  | 0.0307518 | 0.5605597 | up       |            |           |
| Q6P4T2    | 320632     | ENSMUSG00C | Snrnp200   | 2.0970093 | 0.0336813 | 0.5605597 | up       |            |           |
| Q811D0    | 13383      | ENSMUSG00C | D1g1       | 1.0893764 | 0.0006464 | 0.3937941 | up       |            |           |
| Q8JZQ2    | 69597      | ENSMUSG00C | Afg3l2     | -2.040302 | 0.0199168 | 0.5605597 | down     |            |           |
| Q80YV2    | 232679     | ENSMUSG00C | Zc3hc1     | 4.0708234 | 0.0286952 | 0.5605597 | up       |            |           |
| Q91VN4    | 66098      | ENSMUSG00C | Chchd6     | -2.162281 | 0.0170803 | 0.5605597 | down     |            |           |
| B9EJ80    | 107368     | ENSMUSG00C | Pdzd8      | 1.6700126 | 0.0288419 | 0.5605597 | up       |            |           |
| Q3TWL2    | 219024     | ENSMUSG00C | Tmem55b    | 1.5635014 | 0.0202896 | 0.5605597 | up       |            |           |
| Q9D2V7    | 78885      | ENSMUSG00C | Coro7      | -2.057354 | 0.0102673 | 0.5605597 | down     |            |           |
| BOV2N1    | 19280      | ENSMUSG00C | Ptprs      | -1.276306 | 0.0469507 | 0.5605597 | down     |            |           |
| Q61410    | 19092      |            | Prkg2      | 1.2201406 | 0.0004423 | 0.3937941 | up       |            |           |
| Q64105    | 20751      |            | Spr        | -2.012834 | 0.0219064 | 0.5605597 | down     |            |           |
| Q64674    | 20810      | ENSMUSG00C | Srm        | -1.112233 | 0.0087262 | 0.5605597 | down     |            |           |
| Q6ZUW9    | 57294; 10C | ENSMUSG00C | Rps27; Gm  | -1.044048 | 0.0207484 | 0.5605597 | down     |            |           |
| Q6PNC0    | 240283     | ENSMUSG00C | Dmxl1      | 1.0973368 | 0.0430666 | 0.5605597 | up       |            |           |
| Q8CHP8    | 67078      | ENSMUSG00C | Pgp        | -1.863814 | 0.0279975 | 0.5605597 | down     |            |           |
| Q921J2    | 19744      | ENSMUSG00C | Rheb       | -4.848102 | 0.015086  | 0.5605597 | down     |            |           |
| Q62393    | 21985      | ENSMUSG00C | Tpd52      | -1.01293  | 0.0128543 | 0.5605597 | down     |            |           |
| Q69ZR9    | 218850     |            | D14Abbl1e; | -1.90138  | 0.0056368 | 0.5605597 | down     |            |           |
| Q9WV54    | 11886      | ENSMUSG00C | Asah1      | -3.010298 | 0.034621  | 0.5605597 | down     |            |           |
| Q8VE88    | 67726      | ENSMUSG00C | Fam114a2   | 1.6252407 | 0.0110408 | 0.5605597 | up       |            |           |
| P27659    | 27367      | ENSMUSG00C | Rp13       | 3.5291038 | 0.0399089 | 0.5605597 | up       |            |           |

|        |        |            |            |           |           |           |      |
|--------|--------|------------|------------|-----------|-----------|-----------|------|
| Q80U63 | 170731 | ENSMUSG00C | Mfn2       | 1.9016177 | 0.0383257 | 0.5605597 | up   |
| POC913 | 69784  | ENSMUSG00C | 1500009L16 | 1.7665998 | 0.0354231 | 0.5605597 | up   |
| Q3U0S6 | 69903  | ENSMUSG00C | Rasip1     | 1.0201743 | 0.009086  | 0.5605597 | up   |
| B2RQC6 | 69719  | ENSMUSG00C | Cad        | 1.3168462 | 0.0021705 | 0.5605597 | up   |
| 035683 | 54405  | ENSMUSG00C | Ndufa1     | -1.952188 | 0.0150861 | 0.5605597 | down |
| P97384 | 11744  | ENSMUSG00C | Anxa11     | -1.898146 | 0.0072172 | 0.5605597 | down |
| Q9WUH1 | 56395  | ENSMUSG00C | Tmem115    | -1.640199 | 0.0066977 | 0.5605597 | down |
| Q9ESJ1 | 63955  | ENSMUSG00C | Cables1    | 1.8578184 | 0.0206352 | 0.5605597 | up   |
| P61514 | 19981  | ENSMUSG00C | Rp137a     | 3.4384779 | 0.0470074 | 0.5605597 | up   |
| Q80XP8 | 72826  | ENSMUSG00C | Fam76b     | 1.2696532 | 0.0314663 | 0.5605597 | up   |
| P38060 | 15356  | ENSMUSG00C | Hmgcl      | -1.133734 | 0.0335542 | 0.5605597 | down |
| Q9D1M0 | 110379 | ENSMUSG00C | Sec13      | -1.028019 | 0.0236634 | 0.5605597 | down |
| Q60592 | 17776  |            | Mast2      | 1.1399822 | 0.0087666 | 0.5605597 | up   |
| Q8BWY3 | 225363 | ENSMUSG00C | Etf1       | -1.626116 | 0.0425579 | 0.5605597 | down |
| P47867 | 20255  | ENSMUSG00C | Scg3       | 1.4082927 | 0.0203223 | 0.5605597 | up   |
| Q9QY76 | 56491  |            | Vapb       | 1.294663  | 0.0017874 | 0.5605597 | up   |
| Q9EPK7 | 65246  | ENSMUSG00C | Xpo7       | -1.913628 | 0.0261717 | 0.5605597 | down |
| Q6NTA4 | 245670 | ENSMUSG00C | Rragb      | 1.3051323 | 0.0128131 | 0.5605597 | up   |
| Q6PEB6 | 19070  | ENSMUSG00C | Mob4       | -1.681915 | 0.0048933 | 0.5605597 | down |
