# Supplementary figures and images for: Homocysteine impedes neurite outgrowth recovery after intracerebral haemorrhage by downregulating pCAMK2A
Source: HighWire-hosted journal article supplement (doi:10.1136/svn-2022-002165), 2023-02-28

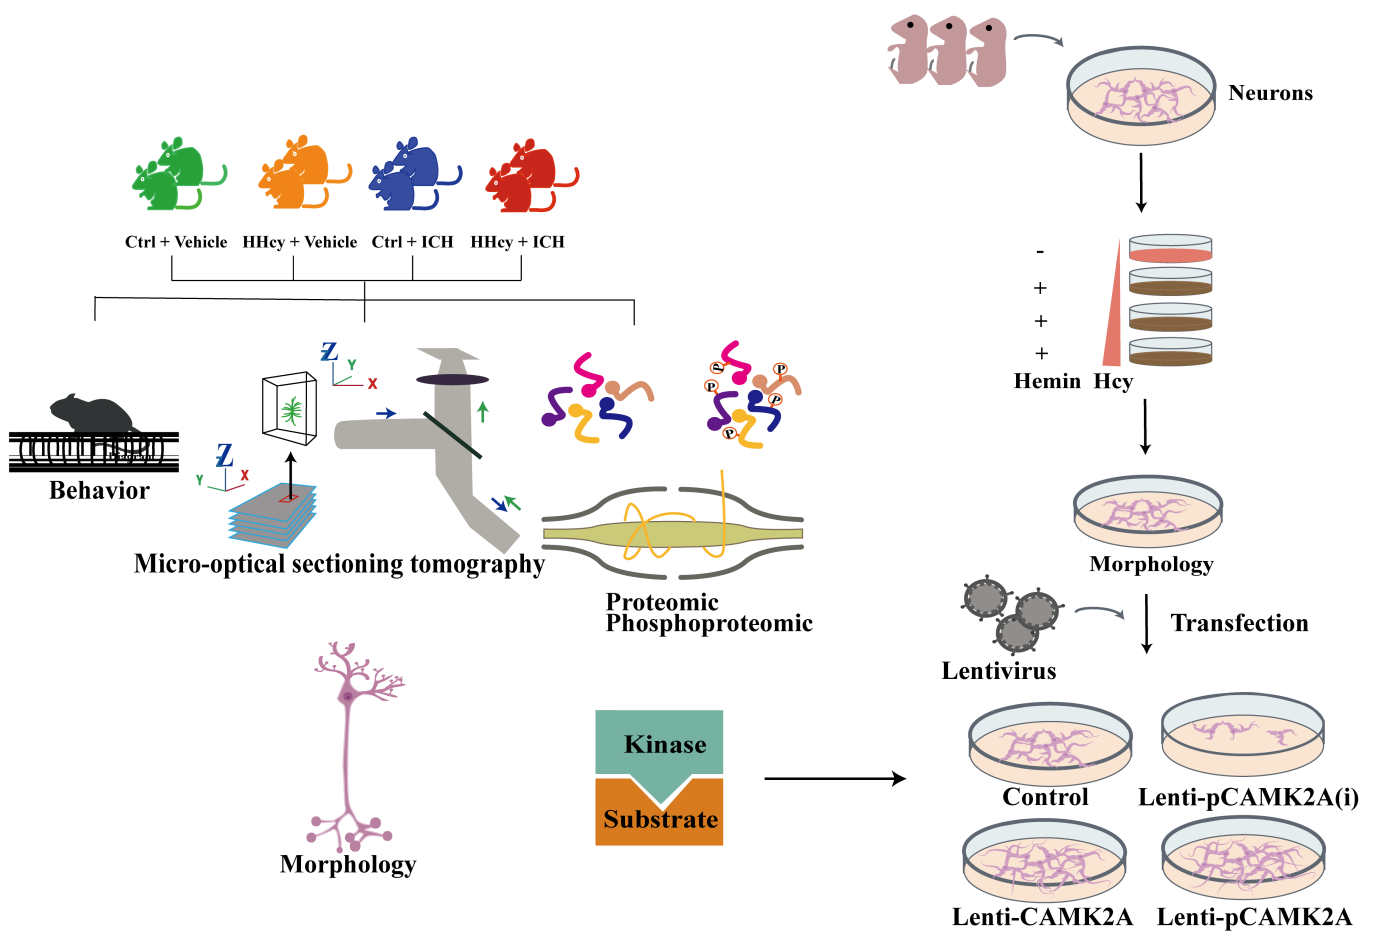

Supplement: svn-2022-002165supp001_data_supplement.pdf [file svn-2022-002165supp001_data_supplement.pdf]

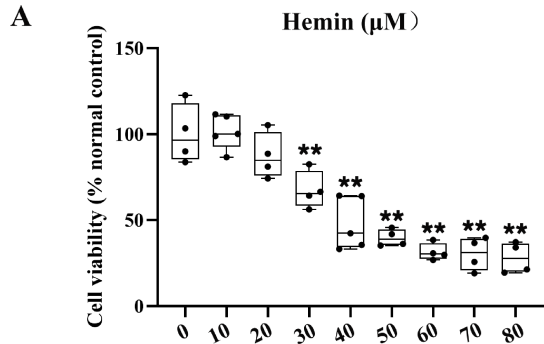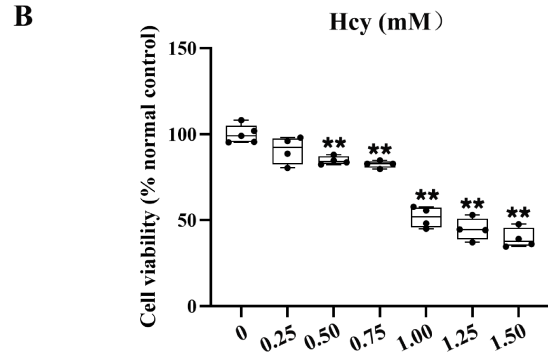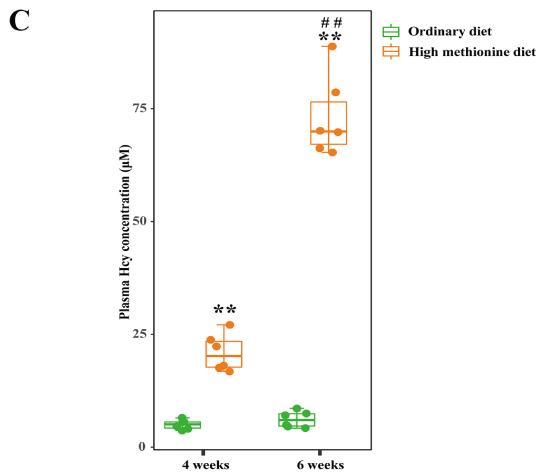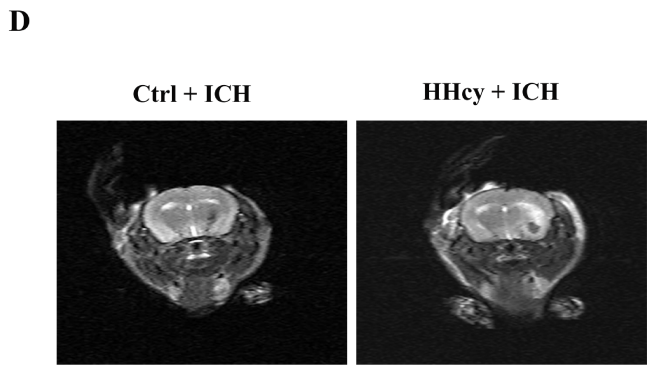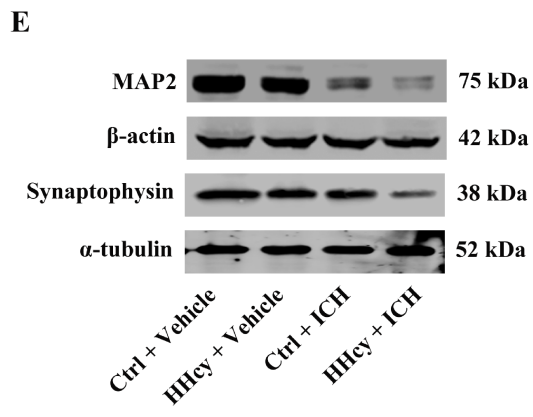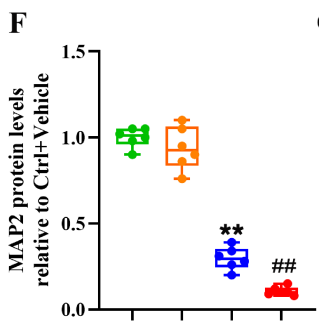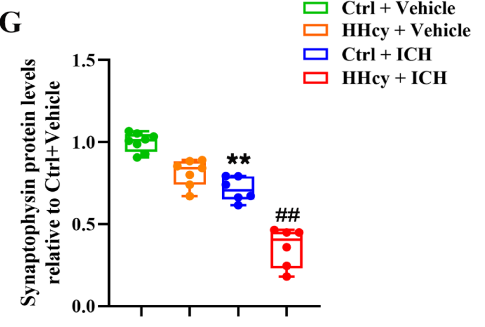

Supplement: svn-2022-002165supp002_data_supplement.pdf [file svn-2022-002165supp002_data_supplement.pdf]

A

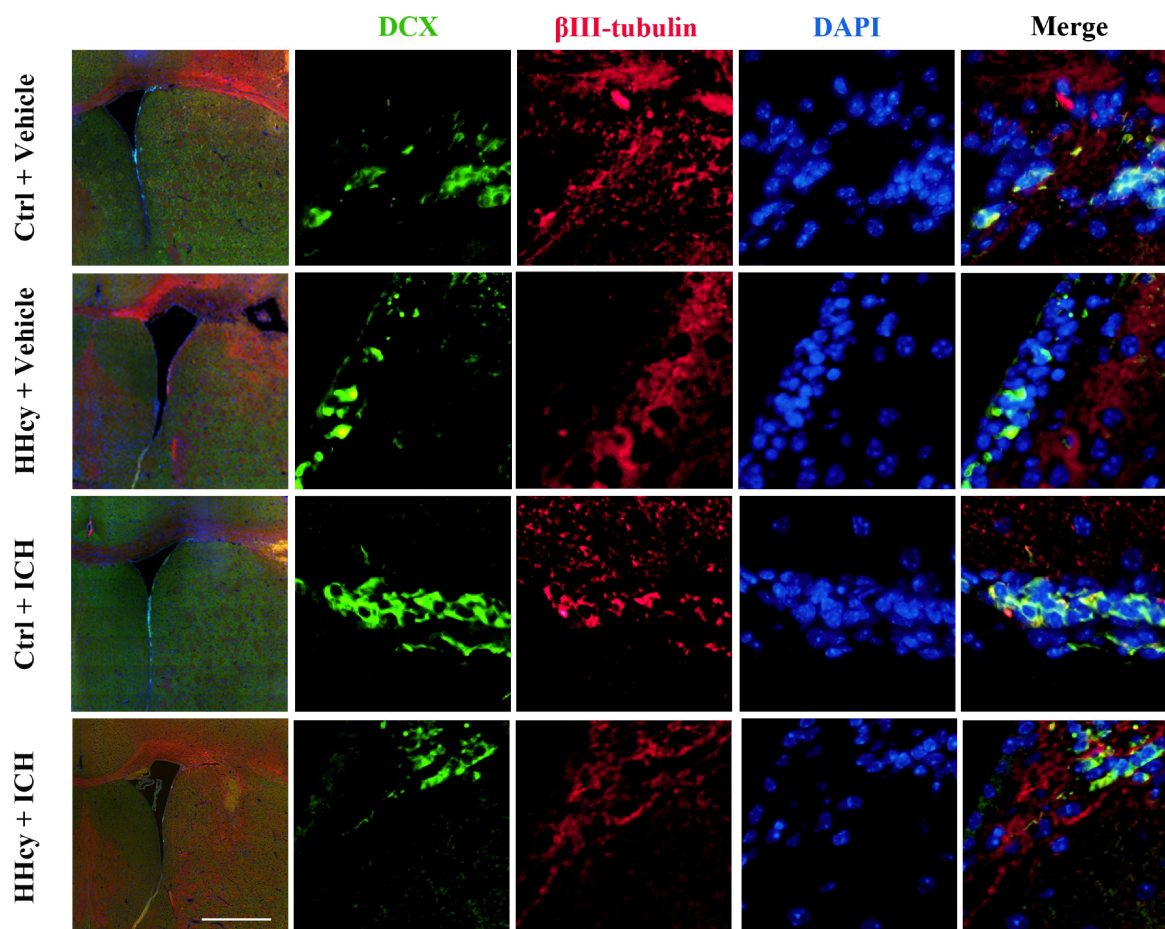

B

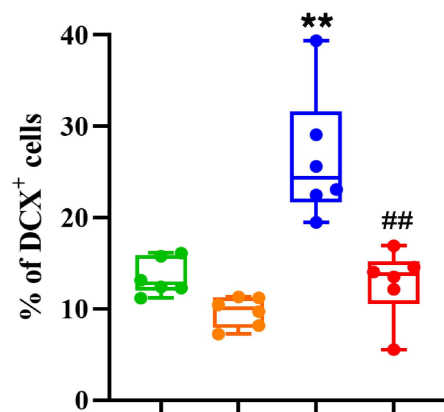

C

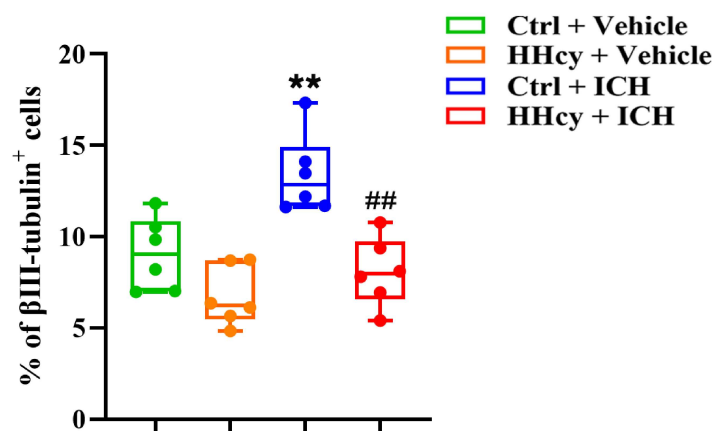

Supplement: svn-2022-002165supp004_data_supplement.pdf [file svn-2022-002165supp004_data_supplement.pdf]
